# Supplementary material
Source: MDPI journal article supplement (https://www.mdpi.com/1424-2818/13/5/186)
Supplement: s1 [file s1]

**Table S2.** List of Ctenophora species in the Mediterranean and the Adriatic seas. Species that form blooms are marked with an asterisk (\*). Introduced species are indicated in bold.

| <b>Taxa</b>                           | Mediterranean | Adriatic |
|---------------------------------------|---------------|----------|
| <i>Bathocyroe fosteri</i>             | +             |          |
| <i>Beroe cucumis</i>                  | +             |          |
| <i>Beroe forskali</i>                 | +             | +        |
| <i>Beroe mitrata</i>                  | +             |          |
| <i>Beroe ovata</i>                    | +             | +        |
| <b><i>Beroe ovata</i></b> sensu Mayer | +             | +        |
| <i>Bolinopsis infundibulum</i>        | +             |          |
| <i>Bolinopsis vitrea</i> *            | +             | +        |
| <i>Callianira bialata</i>             | +             | +        |
| <i>Callianira ficatbi</i>             | +             | +        |
| <i>Ceroctena bicornis</i>             | +             |          |
| <i>Cestum veneris</i> *               | +             | +        |
| <i>Cydidpe ovata</i>                  | +             |          |
| <i>Deiopea kaloktenota</i>            | +             | +        |
| <i>Eschscholtzia pectinata</i>        | +             |          |
| <i>Euplokamis stationis</i>           | +             |          |
| <i>Eurhamphaea vexilligera</i>        | +             |          |
| <i>Haeckelia bimaculata</i>           | +             |          |
| <i>Haeckelia filigera</i>             | +             |          |
| <i>Haeckelia rubra</i>                | +             | +        |
| <i>Hormiphora plumosa</i>             | +             | +        |
| <i>Lampaea pancerina</i>              | +             | +        |
| <i>Leucothea multicornis</i> *        | +             | +        |
| <i>Minictena luteola</i>              | +             |          |
| <b><i>Mnemiopsis leidyi</i></b> *     | +             | +        |
| <i>Ocyropsis maculate imaculata</i>   | +             |          |
| <i>Pleurobrachia pileus</i>           | +             | +        |
| <i>Pleurobrachia rhododactyla</i>     | +             | +        |
| <i>Pleurobrachia rhodopsis</i>        | +             | +        |
| <i>Thalassocalyce inconstans</i>      | +             |          |
| <i>Thoe paradoxa</i>                  | +             |          |
| <i>Velamen parallelum</i>             | +             |          |
