# Supplementary material
Source: MDPI journal article supplement (https://www.mdpi.com/1424-2818/13/5/186)
Supplement: s1 [file s1]

**Table 1.** List of Scyphozoa species in the Mediterranean and the Adriatic seas. Stauromedusae and species known in nature only from the polyp stage are omitted. Type locality according to Jarms and Morandini [1]. Species that form blooms are marked with an asterisk (\*).

| TAXA                                             | Mediterranean | Adriatic | Remarks                                           |
|--------------------------------------------------|---------------|----------|---------------------------------------------------|
| <b>Native</b>                                    |               |          |                                                   |
| <i>Chrysaora hysoscella</i> *                    | +             | +        |                                                   |
| <i>Cotylorhiza tuberculata</i> *                 | +             | +        | Type locality: Mediterranean                      |
| <i>Discomedusa lobata</i> *                      | +             | +        | Type locality: Adriatic                           |
| <i>Drymonema dalmatinum</i>                      | +             | +        | Type locality: Adriatic                           |
| <i>Nausithoe marginata</i>                       | +             |          | Type locality: Mediterranean                      |
| <i>Nausithoe punctata</i>                        | +             | +        | Type locality: Mediterranean                      |
| <i>Paraphyllina rubra</i>                        | +             | +        | Type locality: Adriatic                           |
| <i>Periphylla periphylla</i>                     | +             | +        |                                                   |
| <i>Pelagia noctiluca</i> *                       | +             | +        | Type locality Mediterranean                       |
| <i>Rhizostoma pulmo</i> *                        | +             | +        | Type locality Mediterranean                       |
| <b>Introduced (i) &amp; newly described (nd)</b> |               |          | <b>Author</b>                                     |
| <i>Aurelia coerulea</i> (i)*                     |               | +        | Scorrano et al., 2016 [2]                         |
| <i>Aurelia relict</i> a (nd)                     |               | +        | Scorrano et al., 2016 [2]                         |
| <i>Aurelia solida</i> (i)*                       | +             | +        | Scorrano et al., 2016 [2]                         |
| <i>Cassiopea andromeda</i> (i)                   | +             |          | Spanier, 1989 [3]                                 |
| <i>Cassiopea polypoides</i> (i)                  | +             |          | Lakkis, 1991 [4]                                  |
| <i>Catostylus tagi</i> (i)                       | +             |          | Nastasi, 2010 [5]                                 |
| <i>Chrysaora cf. achylos</i> (nd)                | +             |          | Langeneck, 2019 [6]                               |
| <i>Chrysaora pseudoocelata</i> (nd)              | +             |          | Mutlu, 2020 [7]                                   |
| <i>Cotylorhiza erythraea</i> (i)                 | +             |          | Galil et al. 2017 [8]                             |
| <i>Marivagia stellata</i> (nd)                   | +             |          | Galil et al., 2010 [9]                            |
| <i>Mawia benovici</i> (nd)                       |               | +        | Piraino et al. 2014 [10]; Avian et al., 2016 [11] |
| <i>Phacellophora camtschatica</i> (i)            | +             |          | Fedele, 1937 [12]                                 |
| <i>Phyllorhiza punctata</i> (i)                  | +             |          | Galil et al., 1990 [13]                           |
| <i>Rhizostoma luteum</i> (i)                     | +             |          | Prieto et al., 2013 [14]                          |
| <i>Rhopilema nomadica</i> (nd)*                  | +             |          | Galil et al., 1990 [13]                           |
| <i>Stomolophus meleagris</i> (i)                 | +             |          | Daly Yahia et al., 2003 [15]                      |

1. Jarms, G.; Morandini, A.C. *World Atlas of Jellyfish*; Dölling and Galitz Verlag: Hamburg, Germany, **2019**; pp. 816.
2. Scorrano, S.; Aglieri, G.; Boero, F.; Dawson, M.N.; Piraino, S. Unmasking *Aurelia* species in the Mediterranean Sea: an integrative morphometric and molecular approach. *Zoological Journal of the Linnean Society* **2017**, *180* (2), 243-267. DOI: 10.1111/zoj.12494.
3. Spanier, E. Swarming of jellyfish along the Mediterranean coast of Israel. *Israel J. Zool.*, **1989**, *36*, 55-56.
4. Lakkis, S. Aggregations of scyphomedusae in the Lebanese waters during summer of 1986. . In: *Jellyfish blooms in the Mediterranean*. Proceedings of the II Workshop on Jellyfish in the Mediterranean Sea. MAP Technical Reports Series No. 47, UNEP, Athens, **1991**, pp. 119-127.
5. Nastasi, A. Algal and jellyfish blooms in the Mediterranean and Black Sea: a brief review. . GFCM Workshop on Algal and Jellyfish Blooms in the Mediterranean and Black Sea, October 6-8, **2010**, pp. 57.
6. Langeneck, J.; Crocetta, F.; Doumpas, N.; Giovos, I.; Piraino, S.; Boero, F. First record of the non-native jellyfish *Chrysaora* cf. *Achylos* (Cnidaria: Pelagiidae) in the Mediterranean Sea. *BioInvasion Records* **2019**, *8* (3), 608-61.
7. Mutlu, E.; Tulay Çağatay, I.; Tunca Olguner, M.; Yilmaz H.E. A new sea-nettle from the Eastern Mediterranean Sea: *Chrysaora pseudoocellata* sp. nov. (Scyphozoa: Pelagiidae). *Zootaxa* **2020**, *4790* (2), 229-244.
8. Galil, B.; Gershwin, L.-A.; Zorea, M.; Rahav, A.; Rhotman, B.-S.; Fine, M.; Lubinevsky, H.; Douek, J.; Paz, G.; Rinkevich, B. *Cotylorhiza erythraea* Stiasny, 1920 (Scyphozoa: Rhizostomeae: Cepheidae), yet another erythraean jellyfish from the Mediterranean coast of Israel. *Mar Biodiv.* **2017**, *47*, 229-235.
9. Galil, B.; Gershwin, L.-A.; Douek, J.; Rinkevich, B. *Marivagia stellata* gen. et sp. nov. (Scyphozoa: Rhizostomeae: Cepheidae), another alien jellyfish from the Mediterranean coast of Israel *Aquatic Invasions*, **2010**, *5*, 331-340.
10. Piraino, S.; Aglieri, G.; Martell, L.; Mazzoldi, C.; Melli, V.; Milisenda, G.; Scorrano, S.; Boero, F. *Pelagia benovici* sp. nov. (Cnidaria, Scyphozoa): a new jellyfish in the Mediterranean Sea. *Zootaxa*, **2014**, *3794*, 455-468. 0.11646/zootaxa.3794.3.7
11. Avian, M.; Ramšak, A.; Tirelli, V.; D'Ambra, I.; Malej, A. Redescription of *Pelagia benovici* into a new jellyfish genus, *Mawia*, gen. nov., and its phylogenetic position within Pelagiidae (Cnidaria: Scyphozoa: Semaestomeae). *Invertebr. Syst.* **2016**, *30* (6) 523-546.
12. Fedele, M. Descrizione di una notevole Scifomedusa mediterranea e revisione delle scyphomedusae semaestomeae ulmaridae. *Zool. Anz.*, **1937**, *119*, 195-207.
13. Galil, B.; Spanier, E.; Ferguson, W. The Scyphomedusae of the Mediterranean coast of Israel, including two Lessepsian migrants new to the Mediterranean. *Zool. Med. Leiden*, **1990**, *64*, 95-105.
14. Prieto, L.; Armani, A.; Macias, D. Recent strandings of the giant jellyfish *Rhizostoma luteum* Quoy and Gaimard, 1827 (Cnidaria: Scyphozoa: Rhizostomeae) on the Atlantic and Mediterranean coasts. *Mar. Biol.*, **2013**, *160*, 3241-3247.
15. Daly Yahia, M.; Goy, J.; Yahia-Kefi, O. Distribution and ecology of Medusae and Scyphomedusae (Cnidaria) in Tunis Gulf (SW Mediterranean). *Oceanologica Acta*, **2003**, *26*, 645-655.
